# Supplementary material for: Shoulder Tip Pain During and After Caesarean Section under Spinal Anaesthesia: Incidence, Severity, and Associated Factors in a Tertiary Hospital in Ethiopia
Source: Research Square preprint supplement (doi:10.21203/rs.3.rs-6583873/v1), 2025-06-04
Supplement: Supplementary file 1 [file 27138e42805dd0b6ecb661f4.docx]

**Appendix A – (Supplementary Material 1) (Questionnaire)**

**Title**: Shoulder Tip Pain During and After Cesarean Section Under Spinal Anesthesia: Incidence, Severity, and Associated Factors in a Tertiary Hospital in Ethiopia

**Description**: This questionnaire is designed to collect data on demographic, preoperative, intraoperative, and postoperative factors related to shoulder tip pain in women undergoing cesarean section under spinal anesthesia. Please complete all sections as applicable.

**Section 1: Demographic Characteristics and Preoperative Data**

1. Age (years): __________
2. Weight (kg): __________
3. Height (cm): __________
4. BMI (kg/m²): __________
5. Gravidity: ☐ 1 ☐ 2 ☐ 3 ☐ 4 ☐ 5 ☐ 6 or more
6. Previous Cesarean Delivery: ☐ None ☐ 1 ☐ 2 ☐ 3 ☐ 4 ☐ More than 4
7. Gestational Week: ☐ <37 weeks ☐ 37-38+6 weeks ☐ 39-41+6 weeks ☐ >42 weeks

**Section 2: Intraoperative Data**

1. Intraoperative Position: ☐ Supine/flat ☐ Head up (Reverse Trendelenburg) ☐ Other (specify): __________
2. Sensory Block Level (highest): ☐ T10 ☐ T8 ☐ T6 ☐ T4 ☐ Above T4 ☐ Other (specify): __________
3. Estimated Intraoperative Bleeding: ☐ <500 ml ☐ >500 ml
4. Neonatal Weight (grams): __________
5. Duration of Surgery (minutes): ☐ <45 minutes ☐ 45 to 60 minutes ☐ >60 minutes

**Section 3: Characterization of Shoulder Tip Pain**

This section should be completed only if the patient reported or experienced shoulder tip pain during or after surgery.

1. Timing of Pain Occurrence: ☐ Intraoperative ☐ Postoperative ☐ Both
2. Location of Pain: ☐ Left Shoulder ☐ Right Shoulder
3. Severity of Pain (0-10 Numeric Rating Scale):
   - Intraoperative Pain: ______
   - Postoperative Pain: ______

Comments/Notes: _____________________________________________________
